# Supplementary material for: An attempt to adopt aggregation-induced emission to study organic–inorganic composite materials
Source: Royal Society of Chemistry journal article supplement (doi:10.1039/c8tc01949e), 2018-01-01
Supplement: c8tc01949e1.pdf [file c8tc01949e1.pdf]

Supporting materials for

## **An Attempt to Adopt Aggregation-Induced Emission to Study Organic-Inorganic Composite Coating Materials**

Weili Li<sup>a\*</sup>, Wei Yao<sup>a</sup>, Mike Tebyetekerwa<sup>b,f</sup>, Jijun Tang<sup>a</sup>, Shengyuan Yang<sup>b</sup>, Meifang Zhu<sup>b</sup>, Rong Hu<sup>c</sup>, Anjun Qin<sup>c</sup>, Ben Zhong Tang<sup>c,d</sup>, and Zexiao Xu<sup>e</sup>

*<sup>a</sup>School of Material Science and Engineering, Jiangsu University of Science and Technology, Zhenjiang 212003, P.R. China*

*<sup>b</sup>State Key Laboratory for Modification of Chemical Fibers and Polymer Materials, Donghua University, Shanghai, 201620, P.R. China*

*<sup>c</sup>Guangdong Innovative Research Team, State Key Laboratory of Luminescent Materials and Devices, South China University of Technology, Guangzhou 510640, P.R. China*

*<sup>d</sup>Department of Chemistry, Hong Kong Branch of Chinese National Engineering Research Center for Tissue Restoration and Reconstruction, The Hong Kong University of Science & Technology, Clear Water Bay, Kowloon, Hong Kong, P.R. China*

*<sup>e</sup>Suzhou Jiren Hi-Tech Material Co., Ltd, Suzhou 215143, P.R. China*

*<sup>f</sup>Present Author Address: Research School of Engineering, College of Engineering and Computer Science, The Australian National University, Canberra, Australian Capital Territory 2601, Australia*



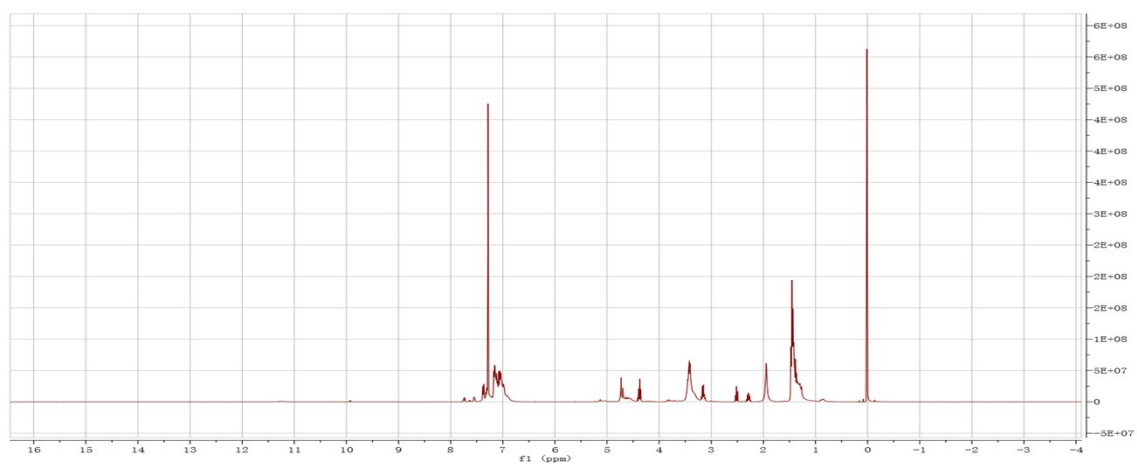

Fig.S1  $^1\text{H}$  NMR of TPE-DBTAB

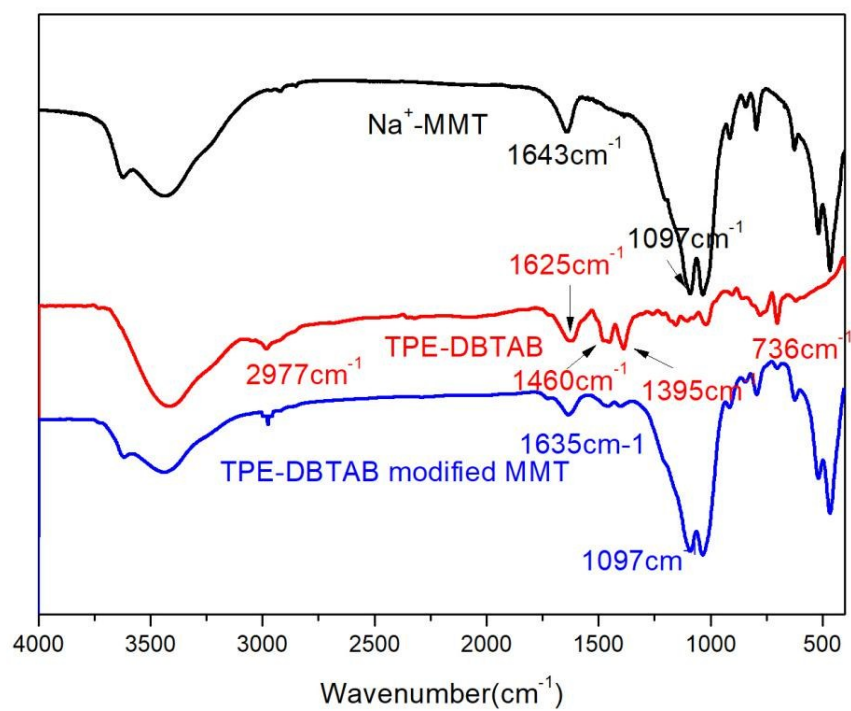

**Fig.S2** FTIR spectra of the testing samples,, Na<sup>+</sup>-MMT, TPE-DBTAB and TPE-DBTAB modified MMT

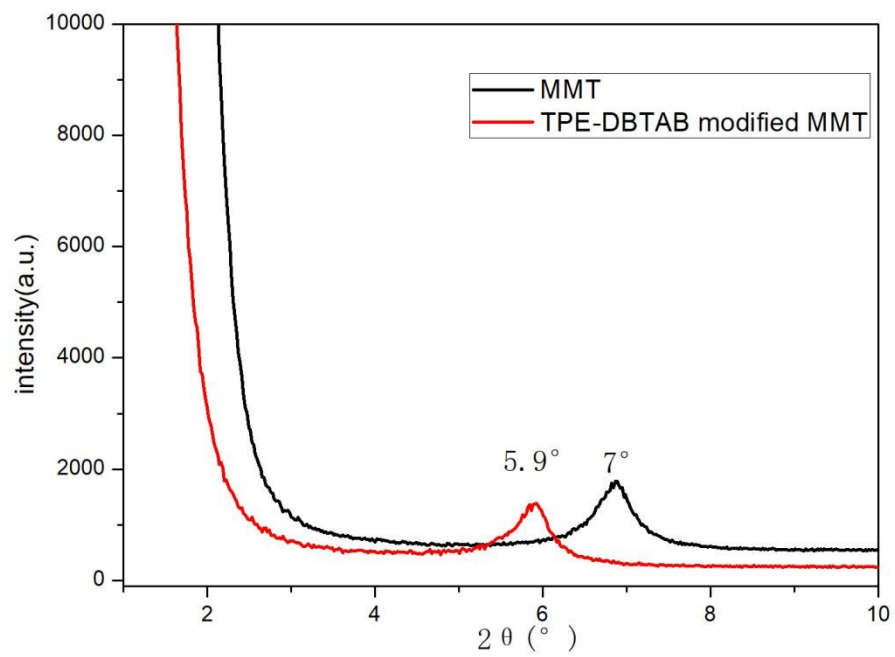

**Fig.S3** X-ray diffraction patterns of the testing samples, MMT and TPE-DBTAB modified MMT

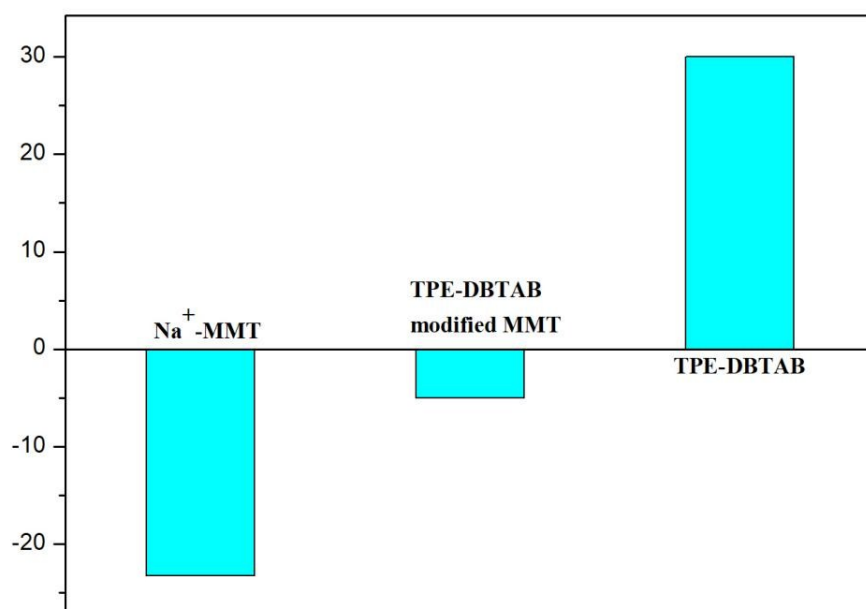

**Fig.S4**  $\xi$  potential of the testing samples, MMT and TPE-DBTAB modified MMT

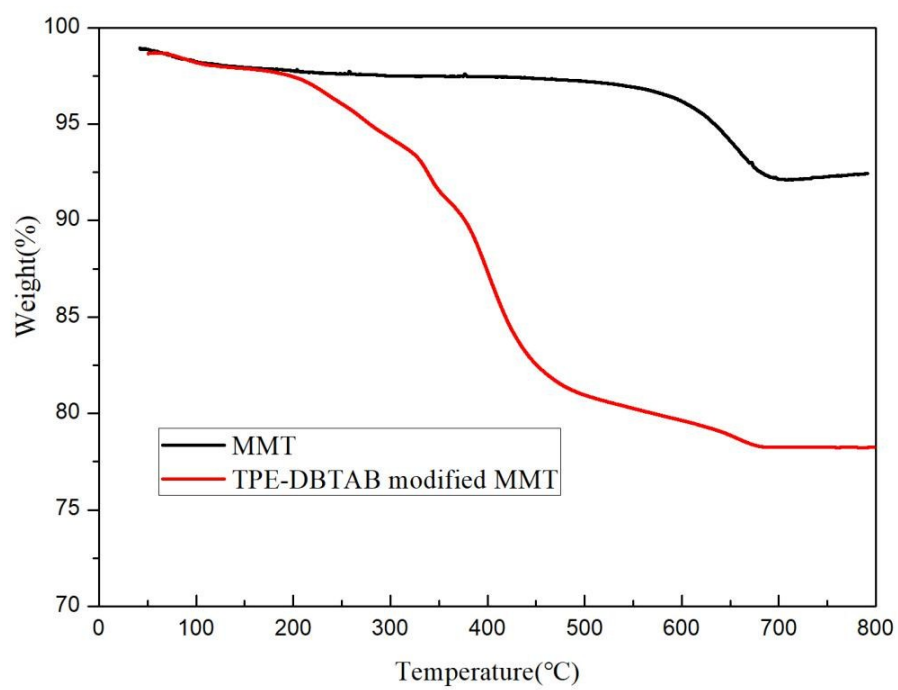

**Fig.S5** TGA result of the testing samples, MMT and TPE-DBTAB modified MMT



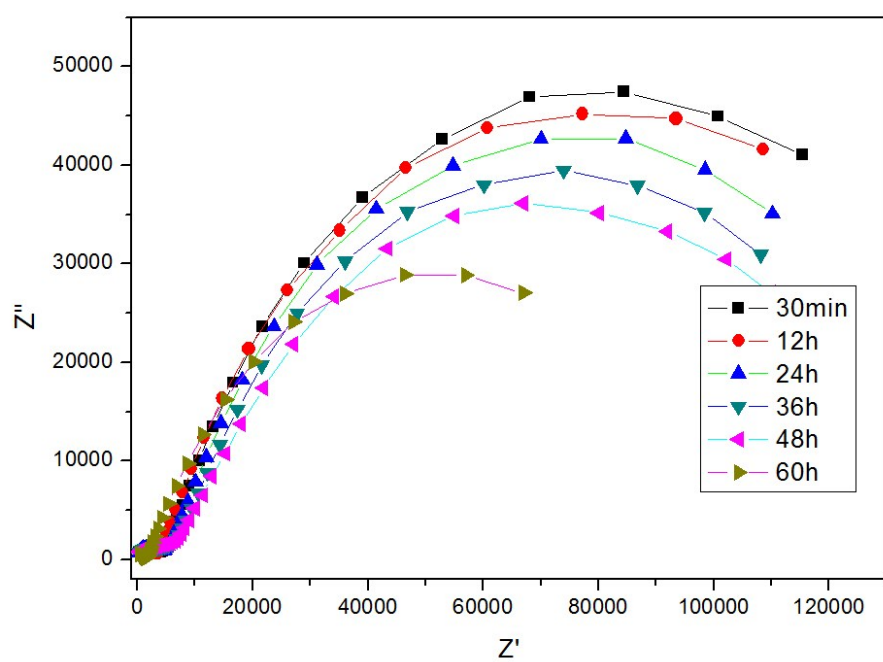

**Fig.S6** EIS of the dried coating varied with its soaking time
